# Supplementary material for: Identification of Efflux Pump Mutations in Pseudomonas aeruginosa from Clinical Samples
Source: MDPI journal article supplement (doi:10.3390/antibiotics12030486), 2023-03-01
Supplement: s1 [file s1]

## Supplementary Files

### Identification of Efflux Pump Responsible for Antibiotic Resistance in *Pseudomonas aeruginosa* from Clinical Samples and In Silico Drug Designing

Sonia Quddus<sup>1</sup>, Zainab Liaqat<sup>1</sup>, Sadiq Azam<sup>1</sup>, Mahboob ul Haq<sup>2</sup>, Sajjad Ahmad<sup>3\*</sup>, Metab Alharbi<sup>4</sup>, Ibrar Khan<sup>1\*</sup>

<sup>1</sup>Centre of Biotechnology and Microbiology, University of Peshawar, Pakistan

<sup>2</sup>Department of Pharmacy, Abasyn University, Peshawar 25000, Pakistan.

<sup>3</sup>Departments of Computer Science and Physics, Center for Soft Matter and Biological Physics, Virginia Tech, Blacksburg, Virginia 24060, USA.

<sup>4</sup>Department of Pharmacology and Toxicology, College of Pharmacy, King Saud University, P.O.Box 2455, Riyadh 11451, Saudi Arabia.

#### Correspondence

Sajjad Ahmad and Ibrar Khan

**Table S1.** Dynamut result of mexA and mexB.

| Gene | delta_vibrational<br>_entropy | ddg_prediction | delta_stability_<br>encom | Mcsm   | mutation | sdm   | duet   |
|------|-------------------------------|----------------|---------------------------|--------|----------|-------|--------|
| MEX  |                               |                |                           |        |          |       |        |
| A    | 0.065                         | 0.075          | -0.052                    | 0.032  | E178K    | 0     | 0.363  |
|      | 0.503                         | -0.242         | -0.403                    | -0.371 | S32P     | -1.18 | -0.479 |
|      | 0.521                         | -0.11          | -0.417                    | -0.31  | K54G     | 0.74  | 0.059  |
|      | 0.177                         | -0.377         | -0.142                    | -0.301 | T55V     | 0.83  | 0.132  |
|      | -0.141                        | 0.255          | 0.113                     | -0.003 | T59D     | -0.36 | 0.183  |
|      | 0.026                         | 0.15           | -0.021                    | -1.091 | A110Y    | 0     | -0.933 |
|      | -0.053                        | 0.38           | 0.042                     | -0.377 | S33Q     | 0.28  | 0.006  |
|      | 0.04                          | -0.415         | -0.032                    | -0.773 | G44K     | -2.62 | -1.043 |
|      | 0.571                         | -0.788         | -0.457                    | -0.561 | K69N     | -0.91 | -0.44  |
|      | -0.353                        | 0.123          | 0.282                     | -0.454 | G100I    | -2.36 | -0.817 |
|      | -0.06                         | -0.569         | 0.048                     | -0.146 | I94Q     | -1.29 | -0.03  |
|      | 0.488                         | -1.075         | -0.39                     | -1.583 | L57S     | -2.49 | -1.76  |
|      | 0.017                         | 0.372          | -0.013                    | -0.013 | N71I     | 1.51  | 0.559  |
| MEX  |                               |                |                           |        |          |       |        |
| B    | -0.036                        | 0.279          | 0.029                     | -0.579 | N28T     | -0.27 | -0.401 |
|      | 0.427                         | -0.597         | -0.342                    | -1.31  | W4T      | -0.28 | -1.084 |
|      | -1.542                        | 1.62           | 1.233                     | -1.691 | A83K     | -3.23 | -1.906 |
|      | -0.027                        | 0.6            | 0.021                     | 0.134  | Q30L     | 1.19  | 0.644  |
|      | 0.013                         | -0.447         | -0.01                     | -0.311 | G74N     | -1.44 | -0.369 |
|      | -0.059                        | -0.001         | 0.047                     | -0.537 | P40I     | -0.03 | -0.218 |
|      | -0.33                         | 0.365          | 0.264                     | -0.849 | P7F      | 0.98  | -0.381 |
|      | 0.032                         | 0.781          | -0.026                    | -0.978 | S101W    | 1.5   | -0.331 |
|      | -0.131                        | 0.656          | 0.105                     | 0.67   | Q62M     | 0.54  | 0.971  |
|      | 0.074                         | -0.146         | -0.059                    | -0.233 | Q58T     | 0.34  | 0.167  |
|      | -0.088                        | -0.031         | 0.07                      | -0.264 | N43T     | 0.2   | 0.039  |
|      | 0.116                         | -0.944         | -0.093                    | -1.066 | K80S     | -1.6  | -1.179 |
|      | 0.893                         | 0.157          | -0.714                    | -0.742 | R78P     | -1.91 | -1.187 |

|        |        |        |        |       |       |        |
|--------|--------|--------|--------|-------|-------|--------|
| -0.137 | 0.037  | 0.11   | -0.064 | Q97S  | -0.91 | 0.155  |
| 0.003  | -0.01  | -0.002 | -0.294 | S22N  | 0.42  | 0.162  |
| -0.109 | 1.418  | 0.087  | -0.239 | S75I  | 2.08  | 0.451  |
| 1.336  | -2.441 | -1.069 | -2.853 | L68S  | -3.89 | -3.204 |
| 0      | 0.273  | 0      | 0.431  | Y106K | -0.03 | 0.715  |
| -0.31  | 0.557  | 0.248  | -0.418 | D6T   | -0.22 | -0.246 |
| 0.934  | -0.319 | -0.747 | -0.79  | Y92G  | 0.3   | -0.514 |
| -0.115 | 0.232  | 0.092  | -0.281 | Q109S | -0.57 | -0.087 |
| -0.022 | -0.005 | 0.018  | 0.38   | H46V  | 0.01  | 0.425  |
| -0.278 | 0.821  | 0.223  | -0.198 | T50L  | 0.99  | 0.232  |
| -0.059 | -0.313 | 0.048  | 0.309  | D73S  | -1.04 | 0.292  |
| -0.156 | -0.144 | 0.125  | -0.23  | L47K  | -0.47 | 0.078  |
| -0.026 | -0.382 | 0.021  | -0.379 | V104P | -2.7  | -0.696 |
| -0.077 | 0.429  | 0.062  | 0.453  | R107L | 0.56  | 0.639  |
| -0.765 | 0.717  | 0.612  | -0.542 | G37R  | -1.14 | -0.593 |
| -0.283 | -0.097 | 0.226  | -0.678 | G89Q  | -1.25 | -0.572 |
| 0.487  | 0.154  | -0.39  | 0.433  | H90V  | 0.14  | 0.46   |
| 0.054  | 0.033  | -0.043 | 0.126  | Q14D  | -0.01 | 0.391  |
| -0.06  | 0.035  | 0.048  | -0.131 | N11T  | 0.01  | 0.303  |
| 0.133  | -0.252 | -0.106 | -0.742 | N65E  | -0.09 | -0.525 |
| 0.393  | -0.08  | -0.315 | -0.142 | L87D  | -0.62 | 0.128  |
| 0.086  | -2.027 | -0.069 | -2.513 | V77D  | -4.38 | -3.011 |
| -0.426 | 0.502  | 0.341  | -0.118 | A96R  | 0.26  | 0.295  |
| -0.2   | 1.607  | 0.16   | -0.252 | P102L | 2.12  | 0.615  |
| -0.048 | -0.074 | 0.039  | 0.134  | N99R  | 0.6   | 0.444  |
| 0.483  | 0.213  | -0.387 | -0.042 | R56V  | 0.64  | 0.235  |
| -0.144 | 0.412  | 0.115  | -0.215 | P72V  | 0.69  | 0.166  |
| -0.156 | -0.108 | 0.125  | -0.273 | I31L  | -0.78 | -0.128 |

|        |        |        |        |       |       |        |
|--------|--------|--------|--------|-------|-------|--------|
| 0.36   | -0.415 | -0.288 | -0.437 | Q27A  | 1.02  | 0.148  |
| 0.141  | 0.074  | -0.113 | -0.129 | D91F  | 0.01  | -0.101 |
| 0.034  | -0.439 | -0.028 | -0.725 | G38Q  | -1.24 | -0.747 |
| -0.071 | -0.033 | 0.057  | -0.17  | D19Q  | -0.18 | 0.164  |
| -0.065 | -0.463 | 0.052  | -0.435 | G34E  | -2.35 | -0.55  |
| 1.689  | -3.385 | -1.351 | -3.319 | F63T  | -2.42 | -3.432 |
| 0.112  | 0.054  | -0.09  | -1.07  | I24L  | 0.28  | -0.644 |
| -0.084 | 0.008  | 0.067  | -0.846 | N9Q   | 0.09  | -0.429 |
| 0.401  | -0.874 | -0.321 | -1.124 | A60G  | -1.79 | -1.244 |
| 0.048  | 0.252  | -0.038 | -0.405 | S21Q  | 1.24  | 0.278  |
| -0.7   | 0.767  | 0.56   | -0.913 | G88F  | -0.07 | -0.81  |
| 0.329  | -0.517 | -0.264 | -0.27  | Q45A  | 1.17  | 0.126  |
| -0.016 | -0.254 | 0.013  | -0.254 | E61S  | -2.47 | -0.441 |
| 0.536  | -0.118 | -0.429 | -0.334 | L36Q  | -1.05 | -0.308 |
| -0.066 | -0.105 | 0.053  | 0.156  | H25Q  | 0.25  | 0.364  |
| 0.128  | -0.036 | -0.102 | -0.996 | L15I  | 0.86  | -0.63  |
| 0.737  | -2.546 | -0.59  | -2.865 | I66D  | -2.44 | -3.139 |
| 0.554  | 0.023  | -0.443 | -0.078 | Q35V  | 1.2   | 0.4    |
| 0.027  | -0.146 | -0.021 | -0.837 | A8E   | 0.42  | -0.29  |
| -0.713 | 0.623  | 0.57   | -1.261 | A23K  | -1.29 | -1.115 |
| -0.158 | 0.34   | 0.127  | 0.189  | D108N | 0.06  | 0.426  |
| -0.033 | 0.279  | 0.027  | 0.103  | S12D  | 0.82  | 0.731  |
| 0.638  | -0.125 | -0.51  | -0.798 | R2T   | -0.42 | -0.627 |
| -0.348 | 0.858  | 0.278  | 0.325  | D81R  | -0.13 | 0.528  |
| -0.577 | 1.049  | 0.462  | -0.386 | G53V  | 0.29  | -0.001 |
| -0.282 | -0.354 | 0.226  | -0.963 | V29P  | -3.81 | -1.545 |
| 0.047  | -0.037 | -0.038 | -0.299 | G18V  | 0.6   | 0.247  |
| 0.392  | -0.251 | -0.314 | -0.982 | L5V   | 0.87  | -0.386 |

|        |        |        |        |       |       |        |
|--------|--------|--------|--------|-------|-------|--------|
| -0.096 | -0.005 | 0.077  | -0.338 | T16A  | -0.2  | -0.247 |
| -0.104 | 0.158  | 0.083  | -0.409 | A26L  | -0.68 | -0.176 |
| 0.187  | -2.405 | -0.149 | -2.525 | V82T  | -2.61 | -2.741 |
| 0.071  | 0.302  | -0.057 | -0.964 | E64K  | -0.46 | -0.709 |
| -0.065 | 0.531  | 0.052  | -0.427 | P17Q  | 1.61  | 0.277  |
| -0.675 | 0.579  | 0.54   | -0.602 | N95Y  | 0.19  | -0.507 |
| -0.583 | 0.118  | 0.466  | -0.731 | G103D | -1.46 | -0.581 |
| -0.136 | 0.065  | 0.108  | -0.369 | I52V  | -0.09 | -0.069 |
| 0.19   | 0.167  | -0.152 | -0.714 | D84G  | 1.49  | -0.063 |
| -0.258 | 0.454  | 0.206  | -0.403 | I51M  | -0.76 | -0.422 |
| 1.075  | -1.103 | -0.86  | -1.544 | Y13P  | -0.65 | -1.523 |
| 1.058  | -3.308 | -0.846 | -2.928 | L10G  | -3.01 | -3.441 |
| -0.546 | 0.746  | 0.436  | -0.331 | F98M  | -0.14 | -0.309 |
| -0.291 | 0.27   | 0.233  | 0.117  | R105A | 0.09  | 0.221  |
| -0.443 | 0.532  | 0.354  | -0.895 | A49F  | 0.02  | -0.765 |
| -0.182 | 0.119  | 0.145  | -0.509 | L39G  | -0.07 | -0.197 |
| -0.202 | 0.454  | 0.162  | -0.679 | V70Y  | -1    | -0.754 |
